# Supplementary material for: Patients’ Opinions on Antibiotics in the Treatment of Dental Infections: A Cross-Sectional Survey
Source: MDPI journal article supplement (doi:10.3390/jcm13072099), 2024-04-03
Supplement: s1 [file s1]

**SURVEY ON ANTIBIOTIC CONSUMPTION IN ENDODONTICS**

1. **GENDER:**    Man ☐    Woman ☐

2. **AGE (years):** ≤30 ☐    30-40 ☐    ≥40 ☐

**3. EDUCATIONAL LEVEL:**

- ☐ - No studies
- ☐ - Primary school
- ☐ - High school
- ☐ - Baccalaureate
- ☐ - Professional training
- ☐ - Higher level training cycle
- ☐ - University degree
- ☐ - Postgraduate university degree
- ☐ - Doctorate (PhD)

**4. Have you ever had an endodontic treatment?**

- ☐ - Yes
- ☐ - No

**5. Before endodontics, do you think it is necessary to take antibiotics?**

- ☐ - Yes
- ☐ - No

**6. After endodontics, do you think it is necessary to take antibiotics?**

- ☐ - Yes
- ☐ - No

**7. If the practitioner does not prescribe antibiotics, I would ask why he/she does not prescribe them?**

- ☐ - Yes
- ☐ - No

**8. If the practitioner does not prescribe antibiotics, would you seek out another doctor to ask why your doctor does not do so?**

- ☐ - Yes
- ☐ - No

9. If a dentist tells you that you have a dental infection, do you expect him to prescribe antibiotics?

- ☐ - Yes
- ☐ - No

10. If you suffer from dental pain, do you expect the professional to prescribe antibiotics?

- ☐ - Yes
- ☐ - No

11. Have you ever self-medicated with antibiotics for dental pain?

- ☐ - Yes
- ☐ - No

12. What benefits do you think antibiotics have? You can choose more than one option.

- ☐ - Decreases pain
- ☐ - Reduces inflammation
- ☐ - Decreases infection
- ☐ - Improves oral health
- ☐ - Does not provide benefits
- ☐ - I do not know

13. What adverse effects do you think the use of antibiotics can cause? You can choose more than one option

- ☐ - Nausea/vomiting
- ☐ - Diarrhea
- ☐ - Fever
- ☐ - Fungal infection
- ☐ - Allergic reaction
- ☐ - None of the above
- ☐ - I do not know

14. When you take antibiotics, for how long do you take them?

- ☐ - 1 day
- ☐ - 2 days
- ☐ - 3 days
- ☐ - 1 week
- ☐ - 2 weeks
- ☐ - Other

15. Do you know about "antibiotic resistance" (a process caused by the abusive use of antibiotics)?

- ☐ - Yes
- ☐ - No

**Supplementary S1.** Survey on antibiotic consumption in endodontics.
